# Supplementary material for: Hyaluronic Acid Compound Filling Plus Mesotherapy vs Botulinum Toxin A for the Treatment of Horizontal Neck Lines: A Multicenter, Randomized, Evaluator-Blinded, Prospective Study in Chinese Subjects
Source: PubMed Central journal article supplement — Aesthet Surg J. 2021 Nov 10;42(4):NP230–41. doi: 10.1093/asj/sjab387 (PMC8972830; doi:10.1093/asj/sjab387), 2021-11-10
Supplement: sjab387_suppl_Supplementary_Appendix.pdf [file sjab387_suppl_Supplementary_Appendix.pdf]

## Patient's Questionnaire

Patient No. \_\_\_\_\_ Date \_\_\_\_\_

Follow-up timepoint:  1-month  3-month  6-month  10-month

### 1. Please grade your satisfaction with the treatment results:

-3 = very dissatisfied  -2 = dissatisfied  -1 = slightly dissatisfied

0 = neutral

1 = slightly satisfied  2 = satisfied  3 = very satisfied

### 2. Do you have any comments & concerns about the treatment you received?

No

If yes, please specify \_\_\_\_\_

---

---

### 3. Have you experienced any discomfort & adverse event after the treatment?

No

If yes, please specify \_\_\_\_\_

---

---

**Thank you for completing the questionnaire.**
